# Supplementary material
Source: PubMed Central journal article supplement (PMC4899228)
Supplement: NIHMS778144-supplement-01.pdf [file NIHMS778144-supplement-01.pdf]

## Supplementary Appendix

Table S1. HCUP comorbidity software variable names, descriptions and ICD codes. (This paper uses HCUP comorbidity software versions 3.0 and 3.1, which cover claims from 2005 and 2006).

|                 | <b>Description</b>                                                                                                                   | <b>ICD codes 2005<sup>1</sup></b>                                           | <b>ICD codes 2006<sup>2</sup></b>                                                                                                                                     |
|-----------------|--------------------------------------------------------------------------------------------------------------------------------------|-----------------------------------------------------------------------------|-----------------------------------------------------------------------------------------------------------------------------------------------------------------------|
| <b>CHF</b>      | Congestive Heart Failure                                                                                                             | 39891, 4280 - 4289                                                          | 39891, 4280 - 4289                                                                                                                                                    |
| <b>PULMCIRC</b> | Pulmonary circulation disorders                                                                                                      | 4160 - 4169, 4179                                                           | 4160 - 4169, 4179                                                                                                                                                     |
| <b>PERIVASC</b> | Peripheral vascular disorders                                                                                                        | 4400 - 4409, 44100 - 4419, 4420 - 4429, 4431 - 4439, 4471, 5571, 5579, V434 | 4400 - 4409, 44100 - 4419, 4420 - 4429, 4431 - 4439, 4471, 5571, 5579, V434                                                                                           |
| <b>HTN</b>      | Hypertension, uncomplicated                                                                                                          | 4011, 4019, 64200 - 64204                                                   | 4011, 4019, 64200 - 64204                                                                                                                                             |
| <b>NEURO</b>    | Other neurological disorders                                                                                                         | 7803, 78039, 7843                                                           | 3300 - 3319, 3320, 3334, 3335, 3337, 3340 - 3359, 340, 3411, 3419, 34500 - 34511, 3452 - 3453, 34540 - 34591, 34700 - 34701, 34710 - 34711, 7803 - 78031, 78039, 7843 |
| <b>CHRNLUNG</b> | Chronic pulmonary disorders                                                                                                          | 490 - 4928, 49300 - 49392, 494 - 4941, 4950 - 505, 5064                     | 490 - 4928, 49300 - 49392, 494 - 4941, 4950 - 505, 5064                                                                                                               |
| <b>DM</b>       | Diabetes w/o chronic complications                                                                                                   | 25000 - 25033, 64800 - 64804                                                | 25000 - 25033, 64800 - 64804                                                                                                                                          |
| <b>DMCX</b>     | Diabetes w/ chronic complications                                                                                                    | 25040 - 25093, 7751                                                         | 25040 - 25093, 7751                                                                                                                                                   |
| <b>RENLFAIL</b> | Renal failure                                                                                                                        | 585, 586, V420, V451, V560 - V5632, V568                                    | 5853, 5854, 5855, 5856, 5859, 586, V420, V451, V560 - V5632, V568                                                                                                     |
| <b>OBESE</b>    | Obesity                                                                                                                              | 2780, 27800, 27801                                                          | 2780, 27800, 27801                                                                                                                                                    |
| <b>LYTES</b>    | Fluid and electrolyte disorders<br><i>note: this comorbidity should be dropped when used with the AHRQ Patient Safety Indicators</i> | 2760 - 2769                                                                 | 2760 - 2769                                                                                                                                                           |
| <b>BLDLOSS</b>  | Blood loss anemia                                                                                                                    | 2800, 64820 - 64824                                                         | 2800, 64820 - 64824                                                                                                                                                   |
| <b>ANEMDEF</b>  | Deficiency anemias                                                                                                                   | 2801 - 2819, 28521 - 28529, 2859                                            | 2801 - 2819, 28521 - 28529, 2859                                                                                                                                      |

<sup>1</sup> <https://www.hcup-us.ahrq.gov/toolssoftware/comorbidity/comformat2005-010405.txt>

<sup>2</sup> <https://www.hcup-us.ahrq.gov/toolssoftware/comorbidity/comformat2006-011207.txt>

Table S2. ICD-9 codes used to identify Chronic Kidney Disease (CKD) stages.

| <b>CKD Stage</b>                      | <b>ICD-9 code</b> |
|---------------------------------------|-------------------|
| <b>I</b>                              | 585.1             |
| <b>II</b>                             | 585.2             |
| <b>III</b>                            | 585.3             |
| <b>IV</b>                             | 585.4             |
| <b>V</b>                              | 585.5             |
| <b>End Stage Renal Disease (ESRD)</b> | 585.6             |
| <b>Unspecified</b>                    | 585.9             |
